# Supplementary material for: Role and regulation of coordinately expressed de novo purine biosynthetic enzymes PPAT and PAICS in lung cancer
Source: PubMed Central journal article supplement (PMC4695129; doi:10.18632/oncotarget.4352), 2015-06-23
Supplement: oncotarget-06-23445-s001.pdf [file oncotarget-06-23445-s001.pdf]

## SUPPLEMENTARY DATA

A

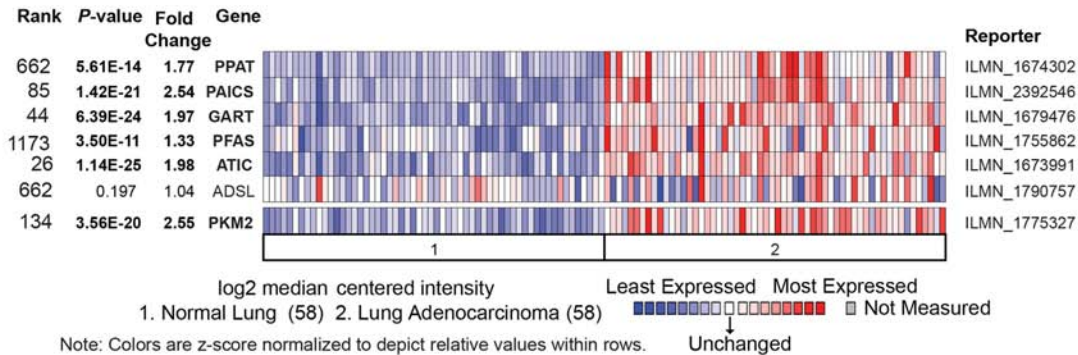

B

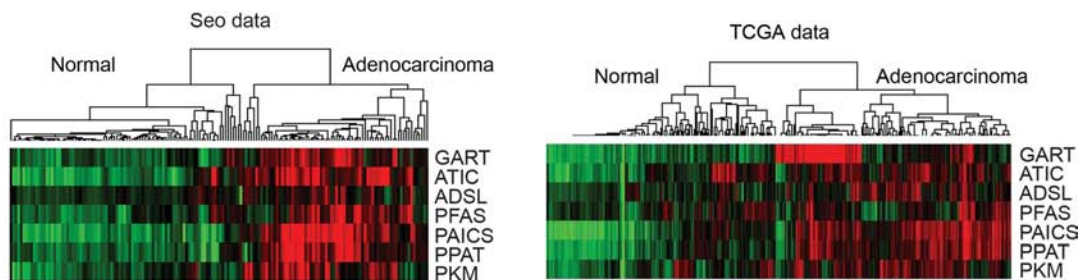

C

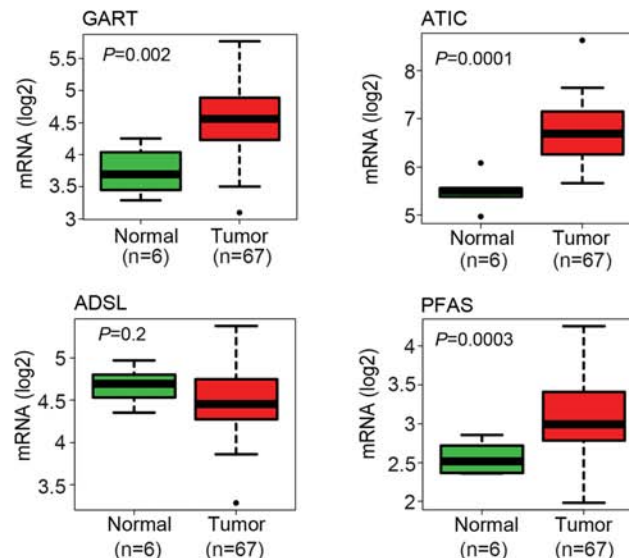

**Supplementary Figure S1: *De novo* purine biosynthetic enzymes and pyruvate kinase M expression in lung adenocarcinoma.** A. Gene expression profiling studies by Oncomine [1] and B. Seo et al(85 AD vs 77 normal) [2] and TCGA(309 AD vs 73 normal) [3, 4] datasets suggest enhanced expression of multiple *de novo* purine biosynthetic enzymes and pyruvate kinase M in lung adenocarcinoma tissues. Expression is represented by a color scale highlighting down-regulation (blue), no alteration (white), and up-regulation (red) of transcripts in S1A. In Figure S1B, down-regulation is represented in green while up-regulation is represented in red. C. Quantitative measurement of *GART*, *ATIC*, *ADSL* and *PFAS* by next-generation RNA sequencing [RPKM (log<sub>2</sub>)] in lung adenocarcinomas [5]. Related to Figure 1.

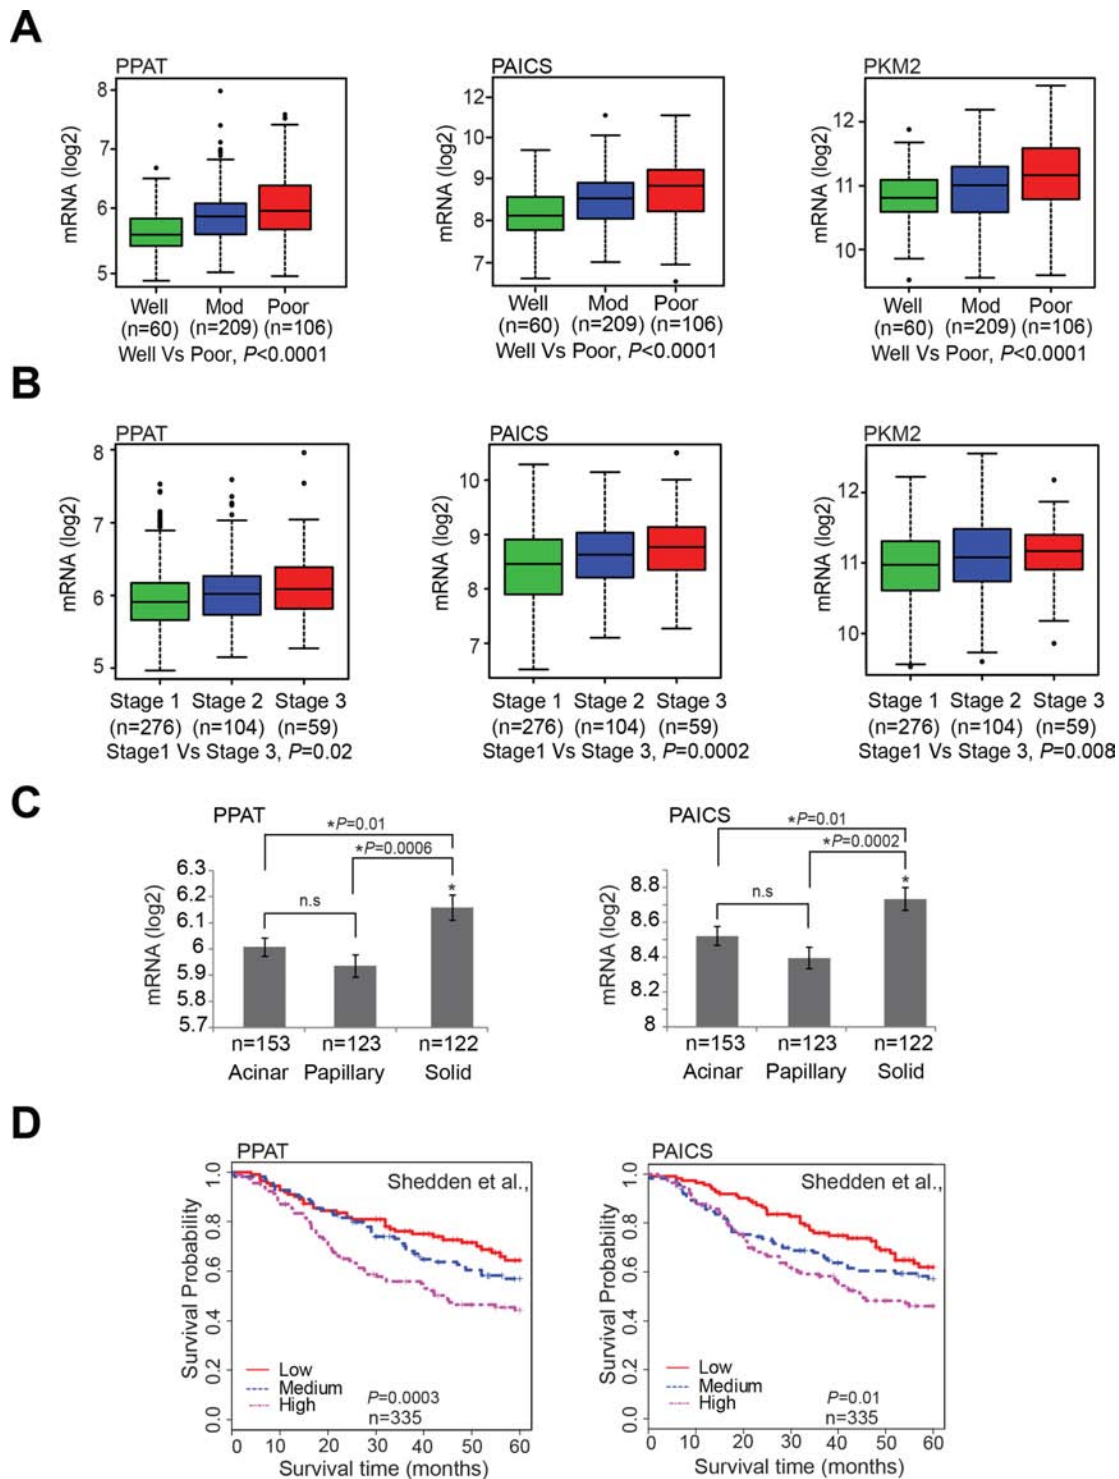

**Supplementary Figure S2: Increased expression of *de novo* purine biosynthesis pathway genes, *PPAT* and *PAICS*, and *PKM2* correlates with poor differentiation status and advanced stage of lung cancer.** **A.** Transcript levels of *PPAT*, *PAICS* and *PKM2* based on differentiation levels (well, moderate or poorly differentiated) and **B.** stage specific manner in lung cancers [6]. **C.** *PPAT* and *PAICS* transcript expression based on morphological type of invasive adenocarcinoma (acinar, papillary or solid). **D.** Kaplan–Meier (K-M) analysis of disease free survival (DFS) time according to the *PPAT* and *PAICS* transcript levels as measured using Affymetrix oligonucleotide microarray datasets (data retrieved from  $n = 335$  out of 442 adenocarcinomas which have disease free survival information) by Shedden *et al* [6]. Related to Figures 1 and 2.

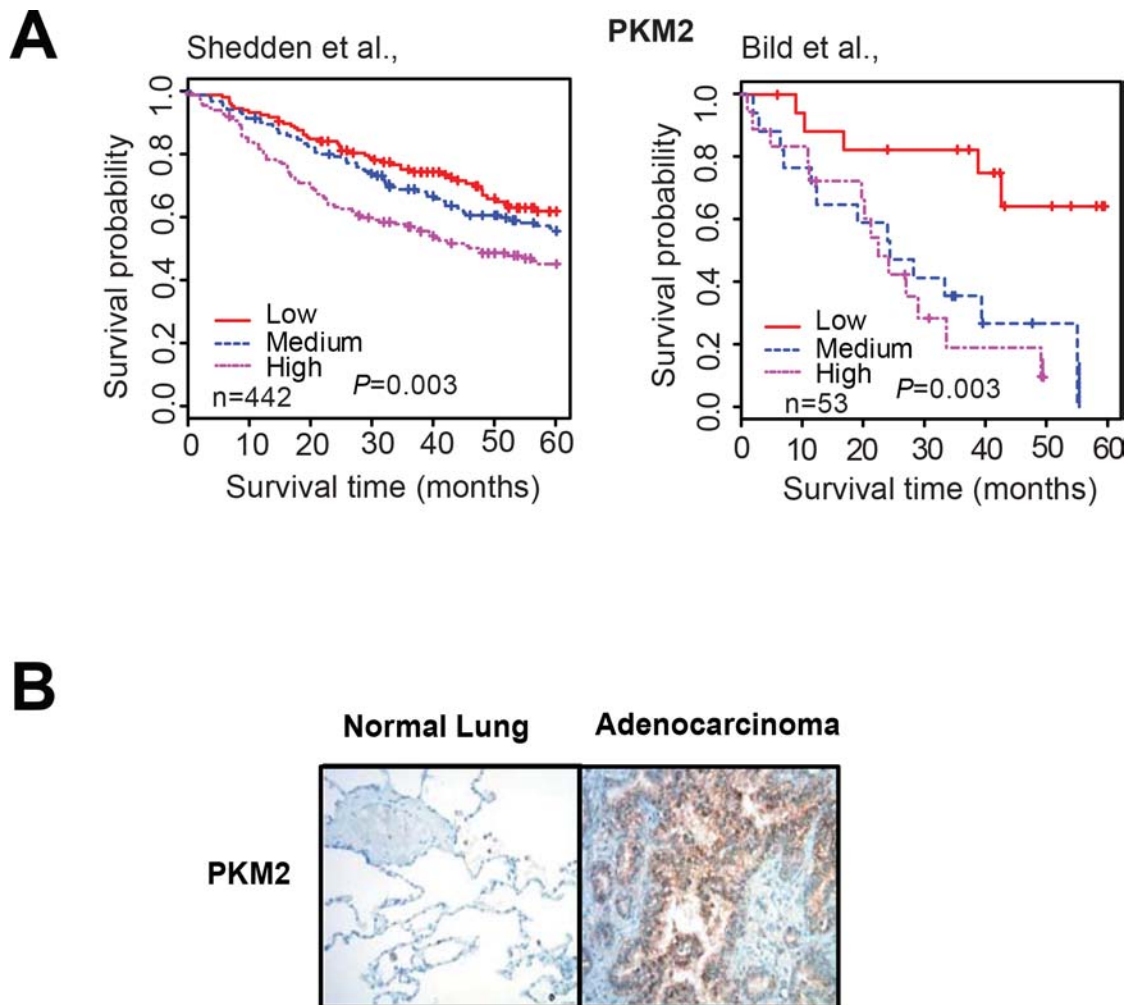

**Supplementary Figure S3: Over-expressed *PKM2* correlates with poor prognosis of lung cancer patients and immunohistochemical analyses show increased *PKM2* expression in lung adenocarcinomas.** **A.** Kaplan-Meier analysis of survival time according to *PKM2* transcript levels as measured using affymetrix oligonucleotide datasets by Shedden *et al* [6] and Bild *et al* [7]. **B.** Photomicrographs of *PKM2* immunostaining in Normal Lung (Left) and Adenocarcinoma (Right) using *PKM2* specific antibodies. Related to Figure 2.

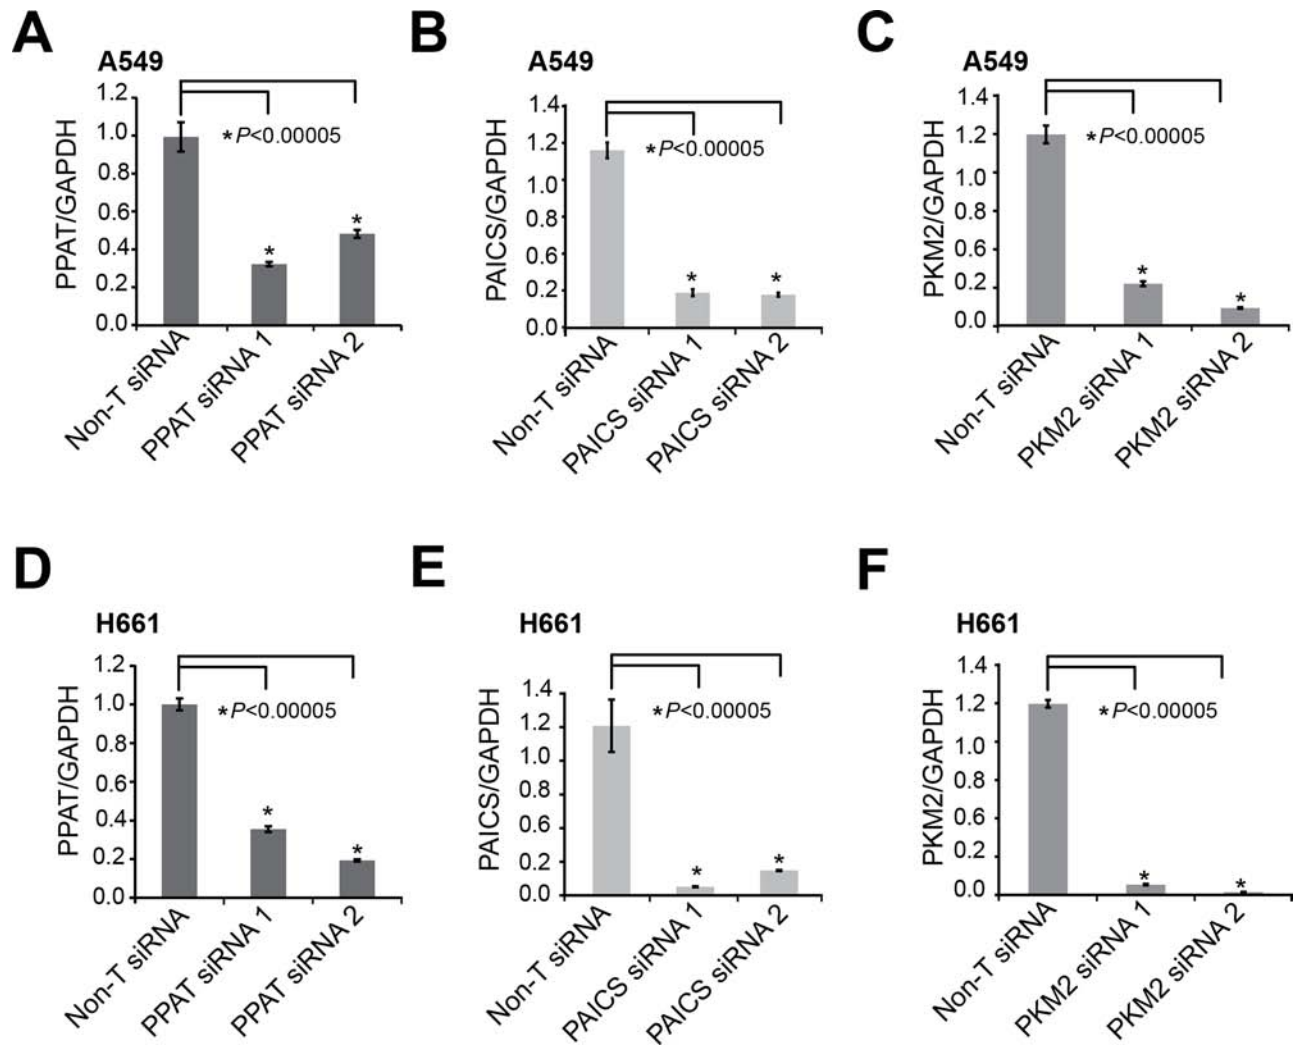

**Supplementary Figure S4: RNA interference using siRNA duplex against *PPAT*, *PAICS* and *PKM2* decreases respective transcripts in multiple lung cancer cell lines.** qRT-PCR analyses of **A, D.** *PPAT*, **B, E.** *PAICS* and **C, F.** *PKM2* transcripts levels in A549 and H661 cells using *GAPDH* for normalization of data. Two independent duplexes were used for the knockdown and measurement of transcript expression. Related to Figure 3.

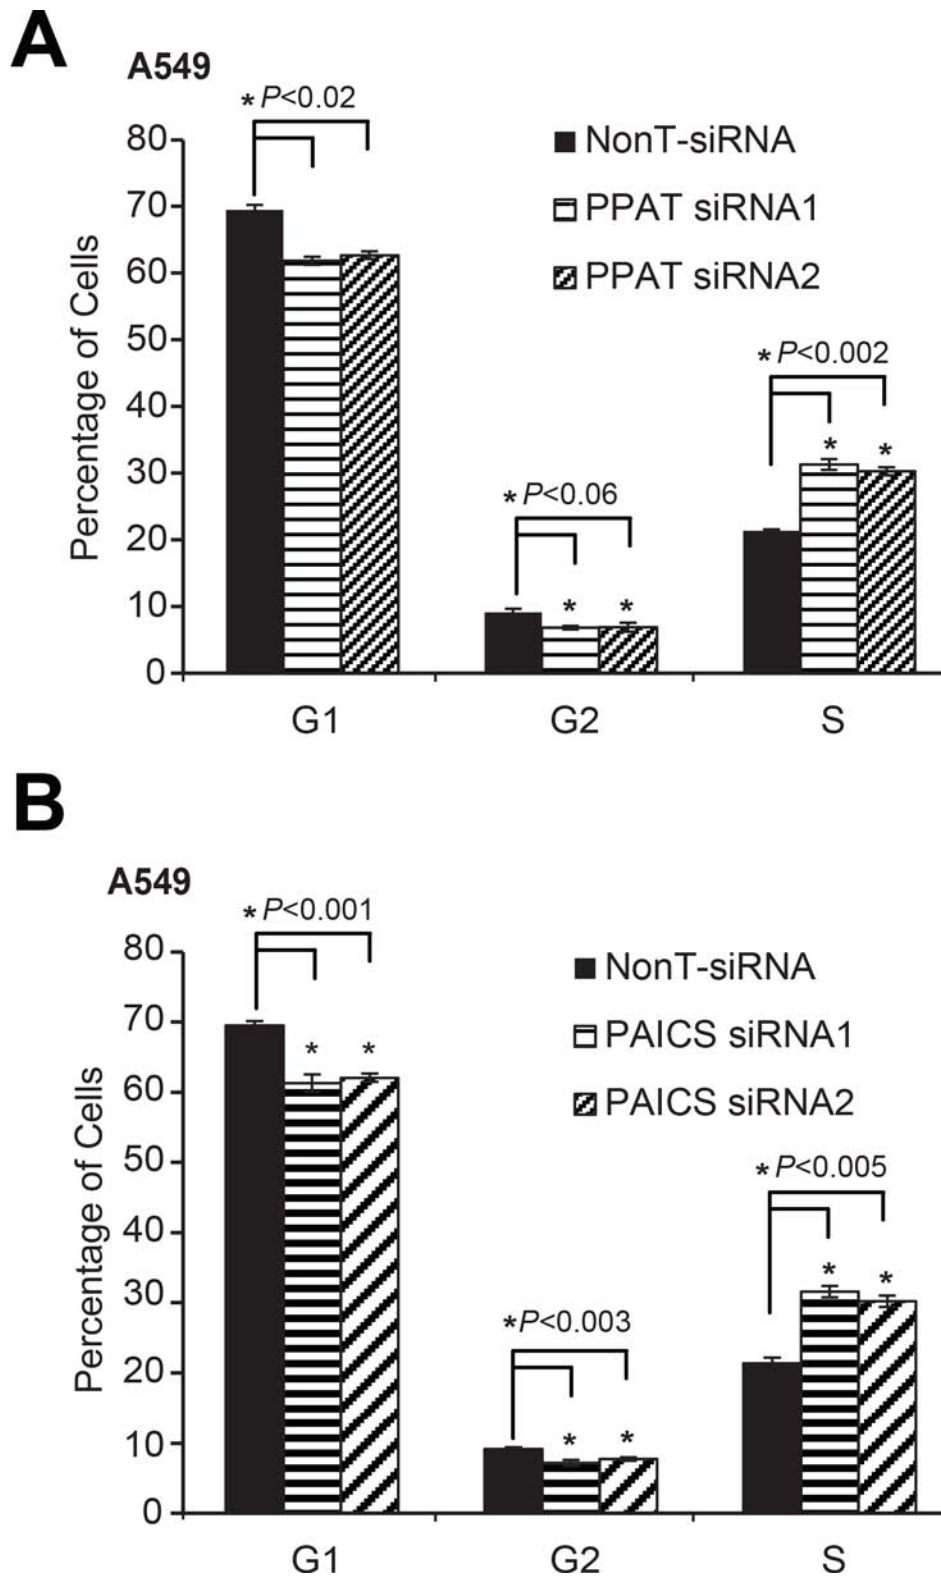

**Supplementary Figure S5: Cell cycle analyses in *PPAT* and *PAICS* knockdown cells show arrest and increase in S-phase.** Cell cycle analyses of A549 cells using siRNA against **A.** *PPAT* and **B.** *PAICS* genes respectively using two independent duplexes. Asterisk indicates data is statistically significant ( $P < 0.05$ ). Related to Figure 3.

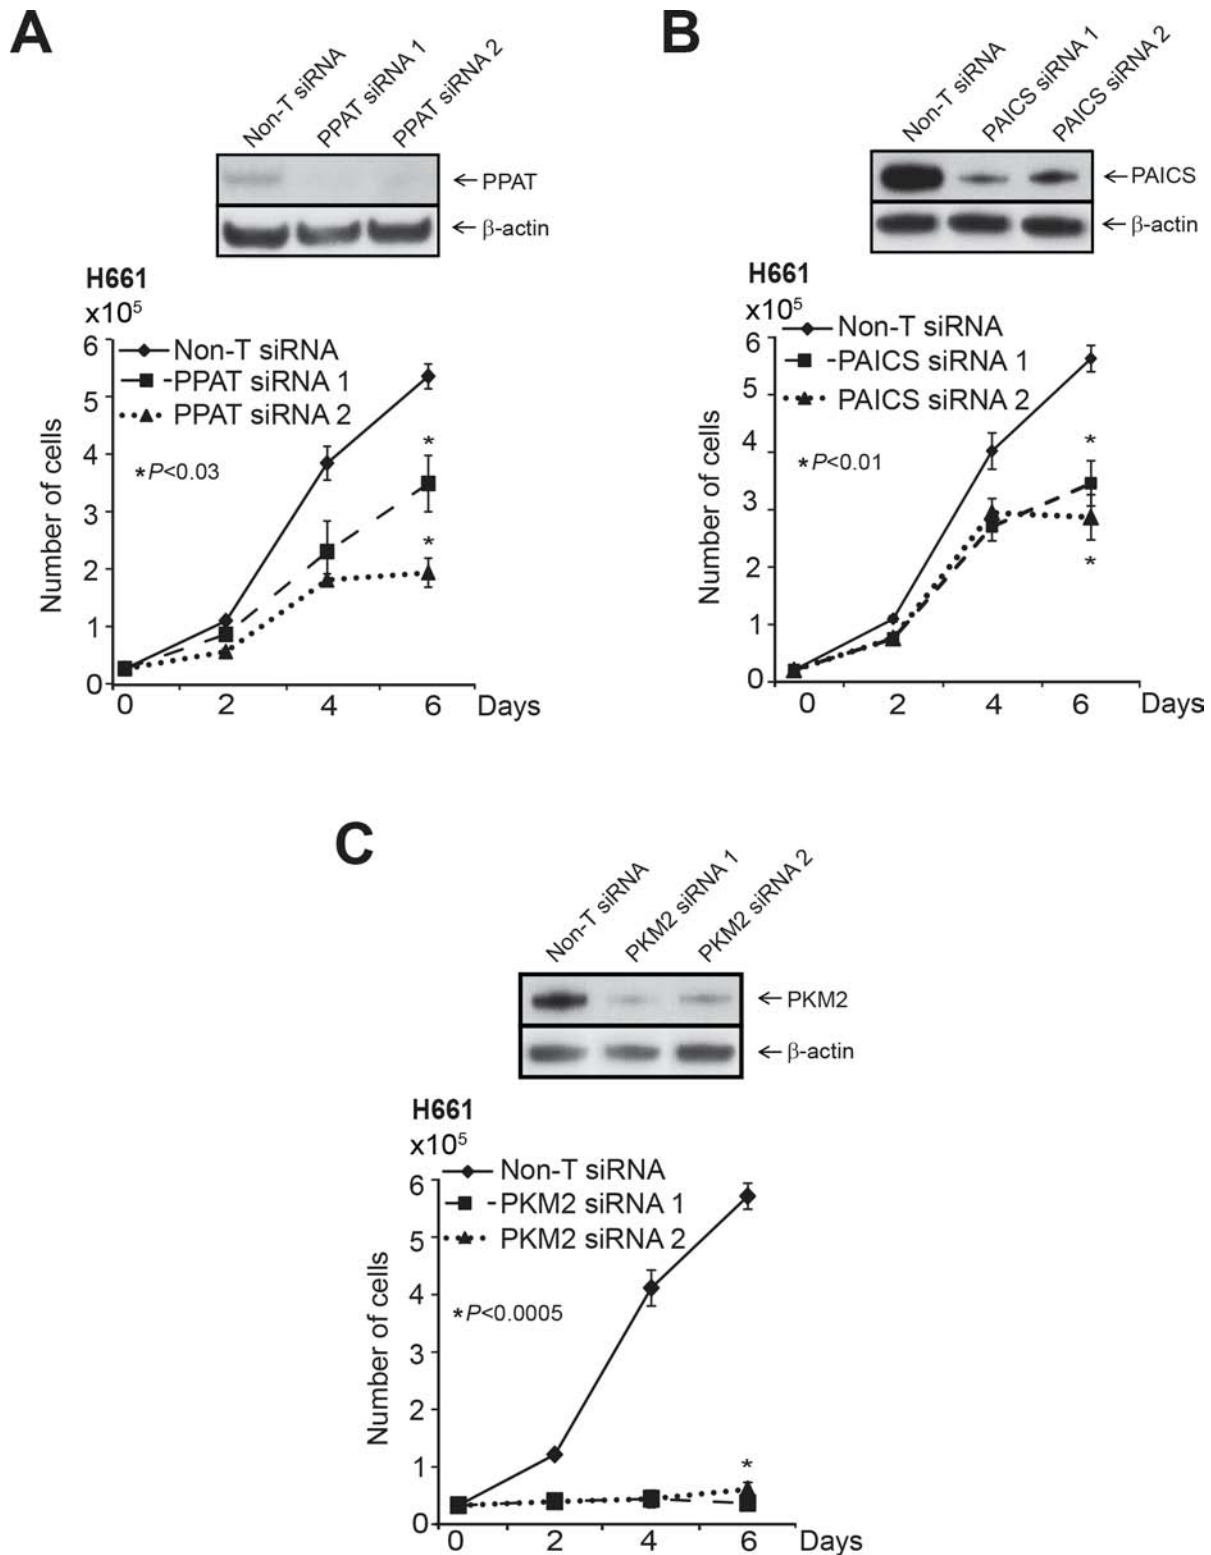

**Supplementary Figure S6: RNA interference using specific siRNA duplex against *PPAT*, *PAICS* and *PKM2* decreases cell proliferation in H661, a large cell carcinoma cell line. A. *PPAT*, B. *PAICS* and C. *PKM2* knockdown was achieved using two independent duplexes followed by measurement of cell proliferation. The inset shows immunoblot analyses of the respective genes after transfection with the duplexes.  $\beta$ -actin was used as a loading control. Related to Figure 3.**

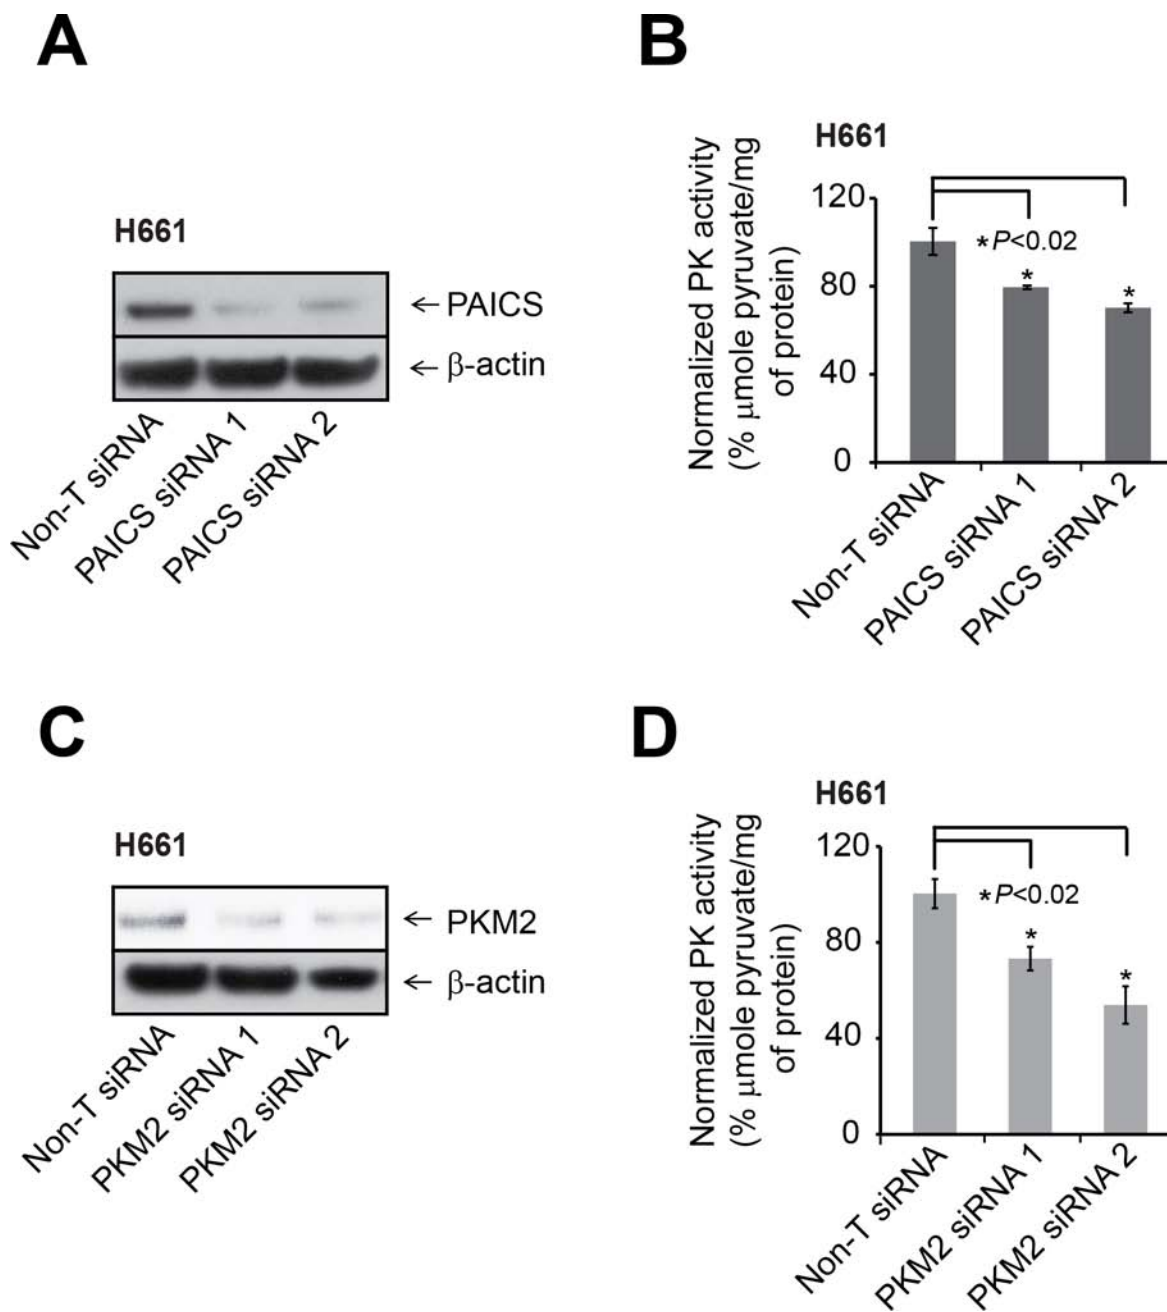

**Supplementary Figure S7: PK activity is modulated on altering *PAICS* and *PKM2* levels in H661 cells.** Knockdown of **A.** *PAICS* and **C.** *PKM2* was achieved using two independent duplexes tested using immunoblot analyses.  $\beta$ -actin was used as loading control. PK activity was measured in **B.** *PAICS* and **D.** *PKM2* knockdown cells. Related to Figure 4.

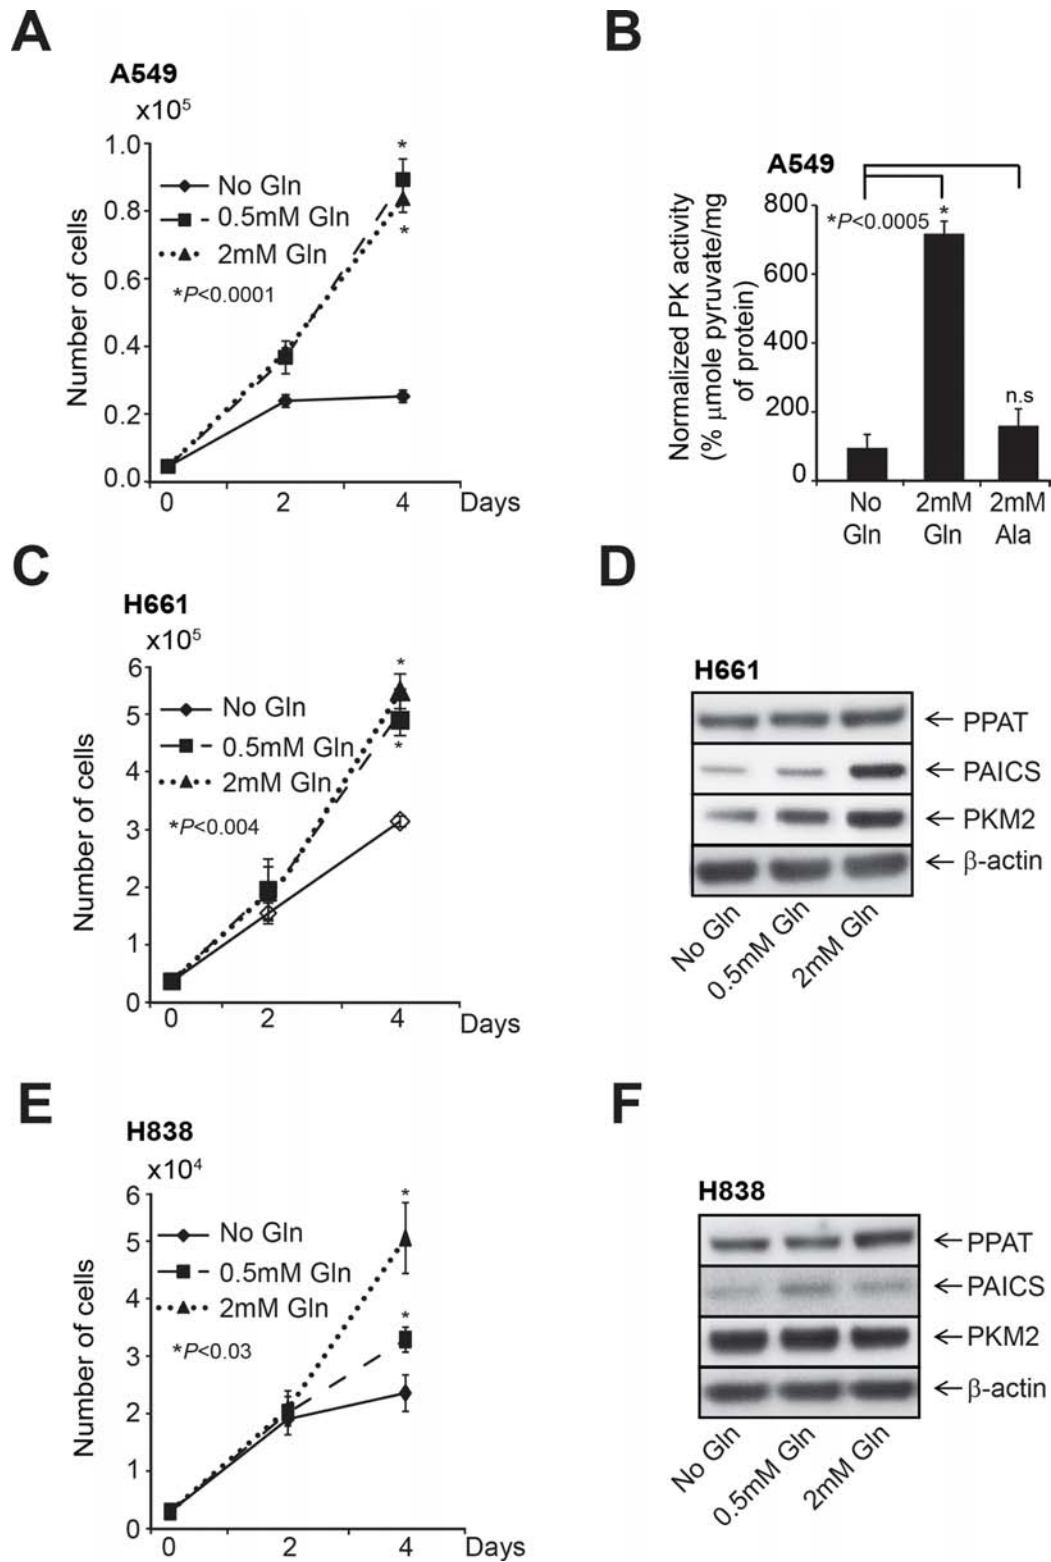

**Supplementary Figure S8: Glutamine triggers cell proliferation and induction of *PPAT* and *PAICS* in multiple lung cancer cells.** Glutamine triggered cell proliferation was measured in **A**. A549, **C**. H661 and **E**. H838 cells. **B**. PK activity was measured in presence of 2 mM glutamine and 2 mM alanine. Minus glutamine was used as a negative control. Glutamine induced *PPAT* and *PAICS* was measured in **D**. H661 and **F**. H838 using immunoblot analyses.  $\beta$ -actin was used as a loading control. Related to Figure 4.



**A**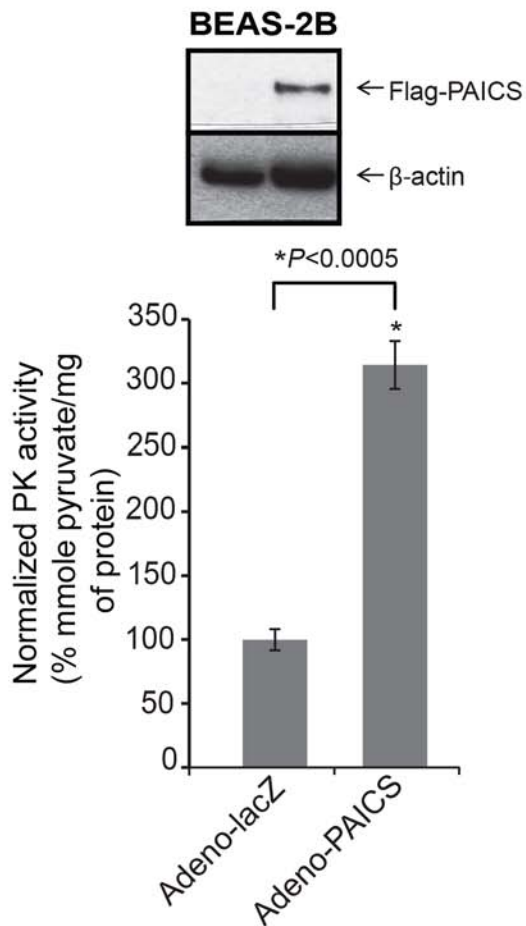**B**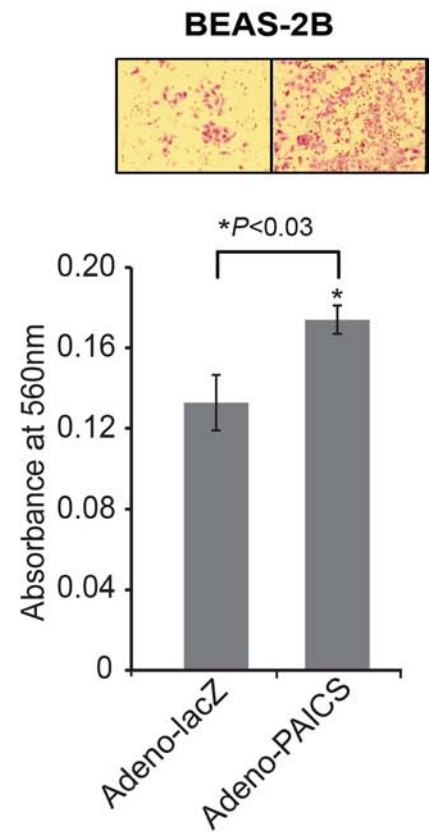

**Supplementary Figure S9: PAICS overexpression induces pyruvate kinase activity and increased invasion in benign lung epithelial cells BEAS-2B.** **A.** BEAS-2B cells were infected with adenovirus containing PAICS-flag (shown as inset immunoblot; flag-antibody#F1804, Sigma-Aldrich, USA) followed by measurement of PK activity. **B.** Following PAICS-Adenovirus transfections, BEAS-2B cell invasion was measured using Boyden Chamber Matrigel invasion assay. Related to Figure 4.

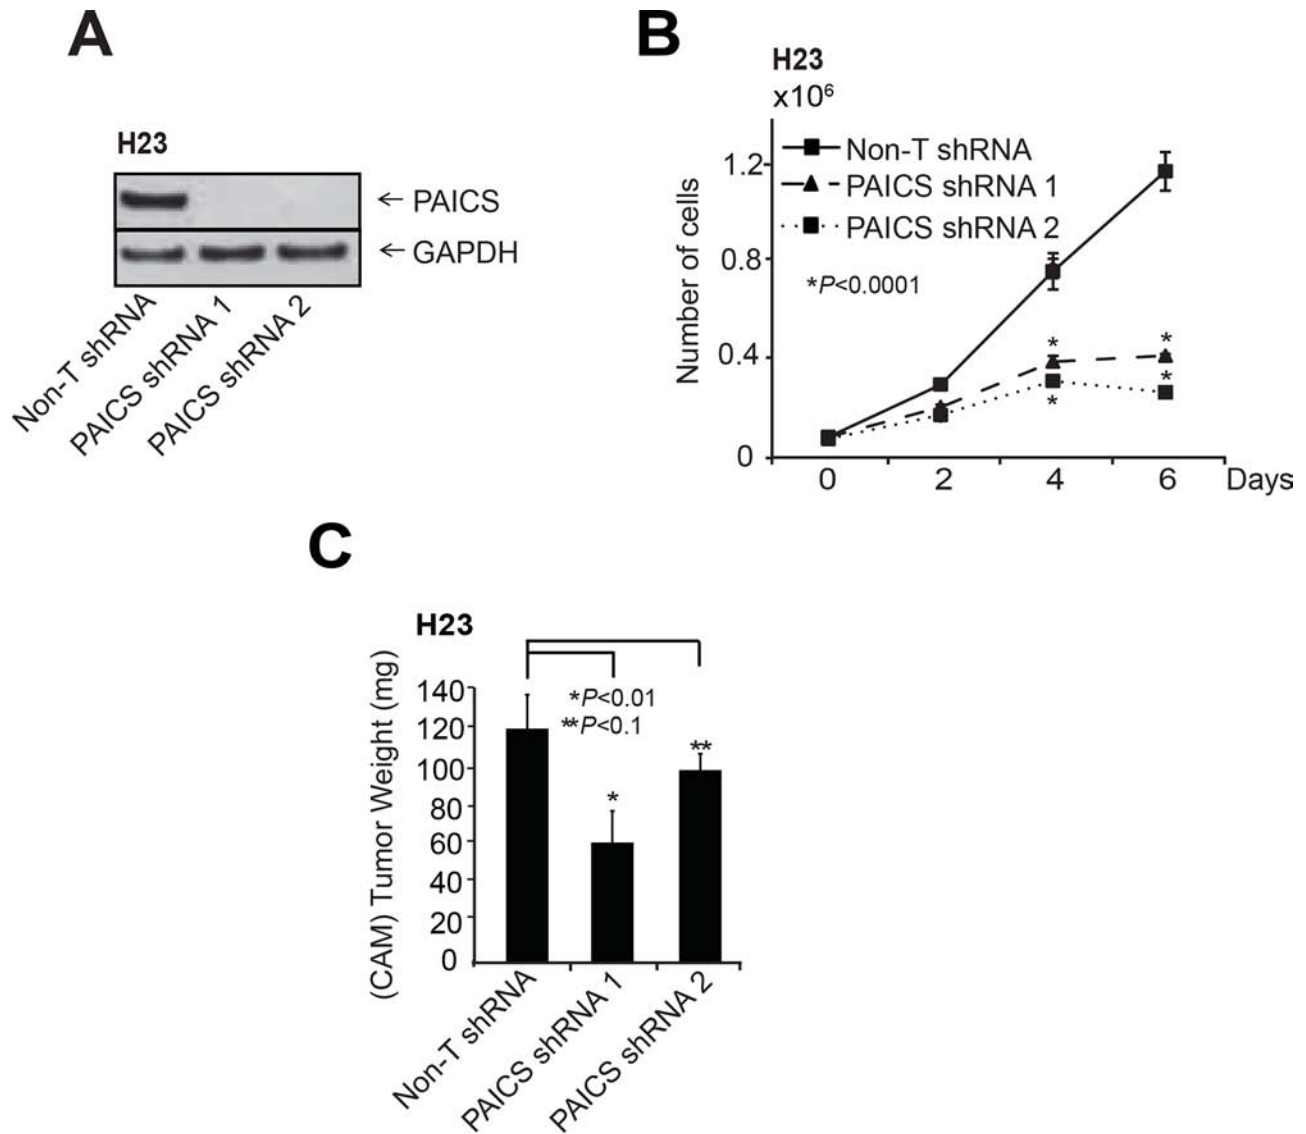

**Supplementary Figure S10: Stable knockdown of *PAICS* in H23 decreases cell proliferation and tumor formation by CAM assay.** Knockdown of *PAICS* in H23 was achieved **A.** by using *PAICS*-specific shRNAs and tested using immunoblot analyses followed by **B.** measuring cell proliferation. **C.** *PAICS* knockdown decreased tumor formation as evaluated by CAM assay. Related to Figure 5.

**Supplementary Table S1. Correlation of PPAT, PAICS, PKM2 mRNA and clinical characteristics in 442 lung adenocarcinomas**

| Variable         | Number | PKM2*         | P value**            |
|------------------|--------|---------------|----------------------|
| Age average (ys) | 64.4   |               |                      |
| <60              | 128    | 6.02          | 0.5                  |
| >= 70            | 149    | 6.13          |                      |
| Gender           |        |               |                      |
| Female           | 219    | 5.93          | 0.0001               |
| Male             | 223    | 6.11          |                      |
| N status         |        |               |                      |
| N0               | 299    | 5.99          | 0.1                  |
| N1-2             | 141    | 6.07          |                      |
| T status         |        |               |                      |
| T1               | 150    | 5.93          |                      |
| T2               | 251    | 6.03          | 0.03 <sup>+</sup>    |
| T3-4             | 39     | 6.29          | 0.0002 <sup>+</sup>  |
| Smoking          |        |               |                      |
| Never            | 49     | 5.79          |                      |
| Past             | 268    | 5.98          | 0.002 <sup>++</sup>  |
| Current          | 32     | 6.21          | 0.0004 <sup>++</sup> |
|                  |        | <b>PAICS*</b> | <b>P value**</b>     |
| Age average (ys) | 64.4   |               |                      |
| <60              | 128    | 8.52          | 0.9                  |
| >= 70            | 149    | 8.64          |                      |
| Gender           |        |               |                      |
| Female           | 219    | 8.4           | 0.0002               |
| Male             | 223    | 8.64          |                      |
| N status         |        |               |                      |
| N0               | 299    | 8.45          | 0.003                |
| N1-2             | 141    | 8.66          |                      |
| T status         |        |               |                      |
| T1               | 150    | 8.44          |                      |
| T2               | 251    | 8.52          | 0.2 <sup>+</sup>     |
| T3-4             | 39     | 8.82          | 0.001 <sup>+</sup>   |
| Smoking          |        |               |                      |
| Never            | 49     | 8.17          |                      |
| Past             | 268    | 8.47          | 0.007 <sup>++</sup>  |
| Current          | 32     | 8.85          | 0.0006 <sup>++</sup> |

(Continued)

| Variable         | Number | PKM2* | P value**         |
|------------------|--------|-------|-------------------|
| Age average (ys) | 64.4   |       |                   |
| <60              | 128    | 11.09 | 0.04              |
| >= 70            | 149    | 10.87 |                   |
| Gender           |        |       |                   |
| Female           | 219    | 10.98 | 0.1               |
| Male             | 223    | 11.05 |                   |
| N status         |        |       |                   |
| N0               | 299    | 10.97 | 0.005             |
| N1-2             | 141    | 11.12 |                   |
| T status         |        |       |                   |
| T1               | 150    | 11    |                   |
| T2               | 251    | 11.02 | 0.6 <sup>+</sup>  |
| T3-4             | 39     | 11.08 | 0.4 <sup>+</sup>  |
| Smoking          |        |       |                   |
| Never            | 49     | 10.98 |                   |
| Past             | 268    | 11.01 | 0.7 <sup>++</sup> |
| Current          | 32     | 11.02 | 0.7 <sup>++</sup> |

AD, adenocarcinoma;

\*mean value (data from Shedden, 2008 Nature Med, U133A Affymetrix, RMA normalized and log2 transformed);

\*\* *t* test;

<sup>+</sup>compared to T1;

<sup>++</sup>compared to Never

**Supplementary Table S2. List of antibodies used in this study**

| <b>Antibody</b>                 | <b>Application</b> | <b>Dilution</b>           | <b>Supplier</b>                                   | <b>Cat. No.</b> |
|---------------------------------|--------------------|---------------------------|---------------------------------------------------|-----------------|
| <b>PPAT</b>                     | IB                 | IB, 1:1000                | Origene, Rockville, MD                            | TA504559        |
|                                 | IHC                | IHC, 1:100                |                                                   |                 |
| <b>PAICS</b>                    | IB                 | IB, 1:10,000              | Genetex, Irvine, CA                               | GTX83950        |
|                                 | IHC                | IHC, 1:10000              |                                                   |                 |
| <b>PKM2</b>                     | IB (Tissue)        | IB, 1:1000                | Cell Signaling Technology                         | 4053S           |
|                                 | IHC                | IHC, 1:500                | Danvers, MA                                       |                 |
|                                 | IB                 | IB, 1:1000                | PTG lab, Chicago, IL                              | 60268-1-Ig      |
| <b>PKM1</b>                     | IB                 | IB, 1:1000                | Cell Signaling Technology<br>Danvers, MA          | 7067            |
| <b><math>\beta</math>-actin</b> | IB                 | IB, 1:20000               | PTG lab, Chicago, IL                              | HRP-60008       |
| <b>Total H3</b>                 | IB                 | IB, 1:1000                | Cell Signaling Technology<br>Danvers, MA          | 9715            |
| <b>GAPDH</b>                    | IB                 | IB, 1:5000                | PTG lab, Chicago, IL                              | HRP-60004       |
| <b>Anti-mouse HRP</b>           | IHC                | Manufacturer instructions | Ventana Medical Systems<br>Roche Diagnostics, USA | 760-4313        |
| <b>Anti-Rabbit HRP</b>          | IHC                | Manufacturer instructions | Ventana Medical Systems<br>Roche Diagnostics, USA | 760-4315        |

**Supplementary Table S3. List and sequence of primers used in this study**

| Gene  | Primers | Sequence                 | Reference       |
|-------|---------|--------------------------|-----------------|
| PAICS | Forward | GTGGCAGGCAGAAGTAATGG     | Custom designed |
| PAICS | Reverse | CACATCCTGAACTCCCCAGT     | Custom designed |
| PKM1  | Forward | CGAGCCTCAAGTCACTCCAC     | [43]            |
| PKM1  | Reverse | GTGAGCAGACCTGCCAGACT     | [43]            |
| PKM2  | Forward | ATTATTTGAGGAACTCCGCCGCCT | [43]            |
| PKM2  | Reverse | ATTCCGGGTCACAGCAATGATGG  | [43]            |
| PPAT  | Forward | GCGATTGAAGCACCTGTGGATG   | Custom designed |
| PPAT  | Reverse | CGGTTTTTACACAGCACCTCCAC  | Custom designed |
| GAPDH | Forward | TGCACCACCAACTGCTTAGC     | Custom designed |
| GAPDH | Reverse | GGCATGGACTGTGGTCATGAG    | Custom designed |

**Supplementary Table S4.** List and sequences of si and shRNAs used in this study

| Gene      | Sequence            | Supplier                                                  | Cat. No.     |
|-----------|---------------------|-----------------------------------------------------------|--------------|
| PPAT si1  | GAAAUGGUCUGGAAUGUUU | Dharmacon, CO, Thermo Fisher Scientific, Pittsburgh, PA   | J-006003-06  |
| si2       | GGAAAUAUCCAGACACAAU | Dharmacon, CO, Thermo Fisher Scientific, Pittsburgh, PA   | J-006003-07  |
| PAICS si1 | GUACACUGGUUGAUUGAA  | Dharmacon, CO, Thermo Fisher Scientific, Pittsburgh, PA   | J-003980-07  |
| si2       | GAAGGGCUCCAAAUGGUAA | Dharmacon, CO, Thermo Fisher Scientific, Pittsburgh, PA   | J-003980-09  |
| PKM2 si1  | AGGCAGAGGCUGCCAUCUA | Dharmacon, CO, Thermo Fisher Scientific, Pittsburgh, PA   | Custom made  |
| si2       | CCAUAUUCGUCCUCACCAA | Dharmacon, CO, Thermo Fisher Scientific, Pittsburgh, PA   | Custom made  |
| PPAT sh1  | TTGTAGGAATGTTTATTCC | Open Biosystems, Thermo Fisher Scientific, Pittsburgh, PA | V2LHS_170267 |
| sh2       | ATTCAAATGCCAATTTGCC | Open Biosystems, Thermo Fisher Scientific, Pittsburgh, PA | V2LHS_170269 |
| PAICS sh1 | GUACACUGGUUGAUUGAA  | System Biosciences, Mountain View, CA                     | Custom made  |
| sh2       | GAAGGGCUCCAAAUGGUAA | System Biosciences, Mountain View, CA                     | Custom made  |

## REFERENCES

1. Selamat SA, Chung BS, Girard L, Zhang W, Zhang Y, Campan M, Siegmund KD, Koss MN, Hagen JA, Lam WL, Lam S, Gazdar AF, Laird-Offringa IA. Genome-scale analysis of DNA methylation in lung adenocarcinoma and integration with mRNA expression. *Genome research*. 2012; 22:1197–1211.
2. Seo JS, Ju YS, Lee WC, Shin JY, Lee JK, Bleazard T, Lee J, Jung YJ, Kim JO, Shin JY, Yu SB, Kim J, Lee ER, Kang CH, Park IK, Rhee H, et al. The transcriptional landscape and mutational profile of lung adenocarcinoma. *Genome research*. 2012; 22:2109–2119.
3. Cerami E, Gao J, Dogrusoz U, Gross BE, Sumer SO, Aksoy BA, Jacobsen A, Byrne CJ, Heuer ML, Larsson E, Antipin Y, Reva B, Goldberg AP, Sander C, Schultz N. The cBio cancer genomics portal: an open platform for exploring multidimensional cancer genomics data. *Cancer discovery*. 2012; 2:401–404.
4. Gao J, Aksoy BA, Dogrusoz U, Dresdner G, Gross B, Sumer SO, Sun Y, Jacobsen A, Sinha R, Larsson E, Cerami E, Sander C, Schultz N. Integrative analysis of complex cancer genomics and clinical profiles using the cBioPortal. *Science signaling*. 2013; 6:p11.
5. Dhanasekaran SM, Alejandro Balbin O, Chen G, Nadal E, Kalyana-Sundaram S, Pan J, Veeneman B, Cao X, Malik R, Vats P, Wang R, Huang S, Zhong J, Jing X, Iyer M, Wu YM, et al. Transcriptome meta-analysis of lung cancer reveals recurrent aberrations in NRG1 and Hippo pathway genes. *Nat Commun*. 2014; 5:5893.
6. Shedden K, Taylor JM, Enkemann SA, Tsao MS, Yeatman TJ, Gerald WL, Eschrich S, Jurisica I, Giordano TJ, Misek DE, Chang AC, Zhu CQ, Strumpf D, Hanash S, Shepherd FA, Ding K, et al. Gene expression-based survival prediction in lung adenocarcinoma: a multi-site, blinded validation study. *Nature medicine*. 2008; 14:822–827.
7. Bild AH, Yao G, Chang JT, Wang Q, Potti A, Chasse D, Joshi MB, Harpole D, Lancaster JM, Berchuck A, Olson JA Jr, Marks JR, Dressman HK, West M, Nevins JR. Oncogenic pathway signatures in human cancers as a guide to targeted therapies. *Nature*. 2006; 439:353–357.
